# Supplementary material for: Cold Acclimation in Brachypodium Is Accompanied by Changes in Above-Ground Bacterial and Fungal Communities
Source: Plants (Basel). 2021 Dec 20;10(12):2824. doi: 10.3390/plants10122824 (PMC8704670; doi:10.3390/plants10122824)
Supplement: Supplementary file 1 [file plants-10-02824-s001.zip › File S1.txt]

File S1: All scripts and commands used in the publication:
Cold acclimation in Brachypodium is accompanied by changes in above-ground bacterial and fungal communities
by: Collin L. Juurakko, George C. diCenzo, and Virginia K. Walker

--------------------
ON THE COMMAND LINE
--------------------

----KRAKEN2----

# install kraken2
git clone https://github.com/DerrickWood/kraken2
./install_kraken2.sh

# add functions to PATH
export PATH="$PATH:/datadisk1/Users/Collin/kraken2/"

# download taxonomy
kraken2-build --download-taxonomy --db kraken2db

# download refseq databases
kraken2-build --download-library archaea --db kraken2db
kraken2-build --download-library bacteria --db kraken2db
kraken2-build --download-library fungi --db kraken2db
kraken2-build --download-library protozoa --db kraken2db

# build the database and specify number of threads to use
kraken2-build --build --db --threads 12 kraken2db

----BRACKEN----

# install bracken
git clone https://github.com/jenniferlu717/Bracken
bash isntall_bracken.sh

# add functions to PATH
export PATH="$PATH:/datadisk1/Users/Collin/bracken/"

#build the database (threads = 12, kmer length = 35, read length = 150)
bracken-build -d kraken2db -t 12 -k 35 -l 150

----SUNBEAM----

# install dev branch of Sunbeam
git clone -b dev https://github.com/sunbeam-labs/sunbeam sunbeam-dev
cd sunbeam-dev
./install.sh

# run tests
source activate sunbeam
bash tests/run_tests.bash

# to start new project ("my_project" replace with whatever you want to name it, last part is path to raw .fastq files)
source activate sunbeam
sunbeam init my_project --data_fp /sequencing/project/reads
sunbeam init meta --data_fp /home/collin/metagenomes/

# creates .yml file

# edit .yml file with path to local host sequences for decontamination
path to host: "/datadisk1/Users/Collin/host/"

# edit .yml file with path to local kraken2 database
path to kraken: "/datadisk1/Users/Collin/kraken2db/"

# edit .yml file with path to local blast database
path to blast: "/datadisk1/Users/Collin/blastdb/"

# add Kraken2 commands to $PATH
export PATH="$PATH:/datadisk1/Users/Collin/kraken2/"

# run sunbeam
sunbeam run --configfile my_project/sunbeam_config.yml
sunbeam run --configfile meta/sunbeam_config.yml --cores 16

# Run this for blast to work if using blast but it is very slow
# try DIAMOND or use HUMANn3 insteads
export BLASTDB_LMDB_MAP_SIZE=1000000

-------------------------------------------------------------------
IF YOU GET THIS ERROR:
KeyError in line 20 of sunbeam-dev/rules/qc/qc.smk: 'seq_id_ending'
NameError in line 130 'adapter_template' not defined or something 

TRY THIS:
Add this in the .qml file first
qc:
  suffix: qc
  seq_id_ending: '' # add this
  adapter_template: '' # add this too
-------------------------------------------------------------------

----SUNBEAM EXTENSIONS----

# sbx_report
# install sbx_report
sunbeam extend https://github.com/sunbeam-labs/sbx_report sunbeam/extensions/sbx_report

# OR if not using dev-branch
# navigate to extensions directory
cd sunbeam-dev/sunbeam/extensions/
git clone https://github.com/sunbeam-labs/sbx_report sunbeam/extensions/sbx_report

# run sbx_report after running sunbeam on samples
cd sunbeam-dev
source activate sunbeam
sunbeam run --configfile my_project/sunbeam_config.yml --use-conda final_report
sunbeam run --configfile meta/sunbeam_config.yml --use-conda final_report

----RUNNING BRACKEN----

# Syntax
bracken -d ${KRAKEN_DB} -i ${SAMPLE}.kreport -o ${SAMPLE}.bracken -r ${READ_LEN} -l ${LEVEL} -t ${THRESHOLD}
# Add Bracken functions to path
export PATH="$PATH:/datadisk1/Users/Collin/bracken/"

# Phyllum
bracken -d /datadisk1/Users/Collin/kraken2db/ -i /home/collin/sunbeam-dev/meta/sunbeam_output/classify/kraken/CA-leaf-1_S46-taxa.tsv -o /home/collin/mt-meta-bracken/CA-leaf-1-phylum.bracken -r 150 -l P -t 10
bracken -d /datadisk1/Users/Collin/kraken2db/ -i /home/collin/sunbeam-dev/meta/sunbeam_output/classify/kraken/CA-leaf-2_S47-taxa.tsv -o /home/collin/mt-meta-bracken/CA-leaf-2-phylum.bracken -r 150 -l P -t 10
bracken -d /datadisk1/Users/Collin/kraken2db/ -i /home/collin/sunbeam-dev/meta/sunbeam_output/classify/kraken/CA-leaf-3_S48-taxa.tsv -o /home/collin/mt-meta-bracken/CA-leaf-3-phylum.bracken -r 150 -l P -t 10
bracken -d /datadisk1/Users/Collin/kraken2db/ -i /home/collin/sunbeam-dev/meta/sunbeam_output/classify/kraken/CA-rhizo-1_S52-taxa.tsv -o /home/collin/mt-meta-bracken/CA-rhizo-1-phylum.bracken -r 150 -l P -t 10
bracken -d /datadisk1/Users/Collin/kraken2db/ -i /home/collin/sunbeam-dev/meta/sunbeam_output/classify/kraken/CA-rhizo-2_S53-taxa.tsv -o /home/collin/mt-meta-bracken/CA-rhizo-2-phylum.bracken -r 150 -l P -t 10
bracken -d /datadisk1/Users/Collin/kraken2db/ -i /home/collin/sunbeam-dev/meta/sunbeam_output/classify/kraken/CA-rhizo-3_S54-taxa.tsv -o /home/collin/mt-meta-bracken/CA-rhizo-3-phylum.bracken -r 150 -l P -t 10
bracken -d /datadisk1/Users/Collin/kraken2db/ -i /home/collin/sunbeam-dev/meta/sunbeam_output/classify/kraken/NA-leaf-1_S49-taxa.tsv -o /home/collin/mt-meta-bracken/NA-leaf-1-phylum.bracken -r 150 -l P -t 10
bracken -d /datadisk1/Users/Collin/kraken2db/ -i /home/collin/sunbeam-dev/meta/sunbeam_output/classify/kraken/NA-leaf-2_S50-taxa.tsv -o /home/collin/mt-meta-bracken/NA-leaf-2-phylum.bracken -r 150 -l P -t 10
bracken -d /datadisk1/Users/Collin/kraken2db/ -i /home/collin/sunbeam-dev/meta/sunbeam_output/classify/kraken/NA-leaf-3_S51-taxa.tsv -o /home/collin/mt-meta-bracken/NA-leaf-3-phylum.bracken -r 150 -l P -t 10
bracken -d /datadisk1/Users/Collin/kraken2db/ -i /home/collin/sunbeam-dev/meta/sunbeam_output/classify/kraken/NA-rhizo-1_S55-taxa.tsv -o /home/collin/mt-meta-bracken/NA-rhizo-1-phylum.bracken -r 150 -l P -t 10
bracken -d /datadisk1/Users/Collin/kraken2db/ -i /home/collin/sunbeam-dev/meta/sunbeam_output/classify/kraken/NA-rhizo-2_S56-taxa.tsv -o /home/collin/mt-meta-bracken/NA-rhizo-2-phylum.bracken -r 150 -l P -t 10
bracken -d /datadisk1/Users/Collin/kraken2db/ -i /home/collin/sunbeam-dev/meta/sunbeam_output/classify/kraken/NA-rhizo-3_S57-taxa.tsv -o /home/collin/mt-meta-bracken/NA-rhizo-3-phylum.bracken -r 150 -l P -t 10

# Genus
bracken -d /datadisk1/Users/Collin/kraken2db/ -i /home/collin/sunbeam-dev/meta/sunbeam_output/classify/kraken/CA-leaf-1_S46-taxa.tsv -o /home/collin/mt-meta-bracken/CA-leaf-1-genera.bracken -r 150 -l G -t 10
bracken -d /datadisk1/Users/Collin/kraken2db/ -i /home/collin/sunbeam-dev/meta/sunbeam_output/classify/kraken/CA-leaf-2_S47-taxa.tsv -o /home/collin/mt-meta-bracken/CA-leaf-2-genera.bracken -r 150 -l G -t 10
bracken -d /datadisk1/Users/Collin/kraken2db/ -i /home/collin/sunbeam-dev/meta/sunbeam_output/classify/kraken/CA-leaf-3_S48-taxa.tsv -o /home/collin/mt-meta-bracken/CA-leaf-3-genera.bracken -r 150 -l G -t 10
bracken -d /datadisk1/Users/Collin/kraken2db/ -i /home/collin/sunbeam-dev/meta/sunbeam_output/classify/kraken/CA-rhizo-1_S52-taxa.tsv -o /home/collin/mt-meta-bracken/CA-rhizo-1-genera.bracken -r 150 -l G -t 10
bracken -d /datadisk1/Users/Collin/kraken2db/ -i /home/collin/sunbeam-dev/meta/sunbeam_output/classify/kraken/CA-rhizo-2_S53-taxa.tsv -o /home/collin/mt-meta-bracken/CA-rhizo-2-genera.bracken -r 150 -l G -t 10
bracken -d /datadisk1/Users/Collin/kraken2db/ -i /home/collin/sunbeam-dev/meta/sunbeam_output/classify/kraken/CA-rhizo-3_S54-taxa.tsv -o /home/collin/mt-meta-bracken/CA-rhizo-3-genera.bracken -r 150 -l G -t 10
bracken -d /datadisk1/Users/Collin/kraken2db/ -i /home/collin/sunbeam-dev/meta/sunbeam_output/classify/kraken/NA-leaf-1_S49-taxa.tsv -o /home/collin/mt-meta-bracken/NA-leaf-1-genera.bracken -r 150 -l G -t 10
bracken -d /datadisk1/Users/Collin/kraken2db/ -i /home/collin/sunbeam-dev/meta/sunbeam_output/classify/kraken/NA-leaf-2_S50-taxa.tsv -o /home/collin/mt-meta-bracken/NA-leaf-2-genera.bracken -r 150 -l G -t 10
bracken -d /datadisk1/Users/Collin/kraken2db/ -i /home/collin/sunbeam-dev/meta/sunbeam_output/classify/kraken/NA-leaf-3_S51-taxa.tsv -o /home/collin/mt-meta-bracken/NA-leaf-3-genera.bracken -r 150 -l G -t 10
bracken -d /datadisk1/Users/Collin/kraken2db/ -i /home/collin/sunbeam-dev/meta/sunbeam_output/classify/kraken/NA-rhizo-1_S55-taxa.tsv -o /home/collin/mt-meta-bracken/NA-rhizo-1-genera.bracken -r 150 -l G -t 10
bracken -d /datadisk1/Users/Collin/kraken2db/ -i /home/collin/sunbeam-dev/meta/sunbeam_output/classify/kraken/NA-rhizo-2_S56-taxa.tsv -o /home/collin/mt-meta-bracken/NA-rhizo-2-genera.bracken -r 150 -l G -t 10
bracken -d /datadisk1/Users/Collin/kraken2db/ -i /home/collin/sunbeam-dev/meta/sunbeam_output/classify/kraken/NA-rhizo-3_S57-taxa.tsv -o /home/collin/mt-meta-bracken/NA-rhizo-3-genera.bracken -r 150 -l G -t 10

# Species
bracken -d /datadisk1/Users/Collin/kraken2db/ -i /home/collin/sunbeam-dev/meta/sunbeam_output/classify/kraken/CA-leaf-1_S46-taxa.tsv -o /home/collin/mt-meta-bracken/CA-leaf-1-species.bracken -r 150 -l S -t 10
bracken -d /datadisk1/Users/Collin/kraken2db/ -i /home/collin/sunbeam-dev/meta/sunbeam_output/classify/kraken/CA-leaf-2_S47-taxa.tsv -o /home/collin/mt-meta-bracken/CA-leaf-2-species.bracken -r 150 -l S -t 10
bracken -d /datadisk1/Users/Collin/kraken2db/ -i /home/collin/sunbeam-dev/meta/sunbeam_output/classify/kraken/CA-leaf-3_S48-taxa.tsv -o /home/collin/mt-meta-bracken/CA-leaf-3-species.bracken -r 150 -l S -t 10
bracken -d /datadisk1/Users/Collin/kraken2db/ -i /home/collin/sunbeam-dev/meta/sunbeam_output/classify/kraken/CA-rhizo-1_S52-taxa.tsv -o /home/collin/mt-meta-bracken/CA-rhizo-1-species.bracken -r 150 -l S -t 10
bracken -d /datadisk1/Users/Collin/kraken2db/ -i /home/collin/sunbeam-dev/meta/sunbeam_output/classify/kraken/CA-rhizo-2_S53-taxa.tsv -o /home/collin/mt-meta-bracken/CA-rhizo-2-species.bracken -r 150 -l S -t 10
bracken -d /datadisk1/Users/Collin/kraken2db/ -i /home/collin/sunbeam-dev/meta/sunbeam_output/classify/kraken/CA-rhizo-3_S54-taxa.tsv -o /home/collin/mt-meta-bracken/CA-rhizo-3-species.bracken -r 150 -l S -t 10
bracken -d /datadisk1/Users/Collin/kraken2db/ -i /home/collin/sunbeam-dev/meta/sunbeam_output/classify/kraken/NA-leaf-1_S49-taxa.tsv -o /home/collin/mt-meta-bracken/NA-leaf-1-species.bracken -r 150 -l S -t 10
bracken -d /datadisk1/Users/Collin/kraken2db/ -i /home/collin/sunbeam-dev/meta/sunbeam_output/classify/kraken/NA-leaf-2_S50-taxa.tsv -o /home/collin/mt-meta-bracken/NA-leaf-2-species.bracken -r 150 -l S -t 10
bracken -d /datadisk1/Users/Collin/kraken2db/ -i /home/collin/sunbeam-dev/meta/sunbeam_output/classify/kraken/NA-leaf-3_S51-taxa.tsv -o /home/collin/mt-meta-bracken/NA-leaf-3-species.bracken -r 150 -l S -t 10
bracken -d /datadisk1/Users/Collin/kraken2db/ -i /home/collin/sunbeam-dev/meta/sunbeam_output/classify/kraken/NA-rhizo-1_S55-taxa.tsv -o /home/collin/mt-meta-bracken/NA-rhizo-1-species.bracken -r 150 -l S -t 10
bracken -d /datadisk1/Users/Collin/kraken2db/ -i /home/collin/sunbeam-dev/meta/sunbeam_output/classify/kraken/NA-rhizo-2_S56-taxa.tsv -o /home/collin/mt-meta-bracken/NA-rhizo-2-species.bracken -r 150 -l S -t 10
bracken -d /datadisk1/Users/Collin/kraken2db/ -i /home/collin/sunbeam-dev/meta/sunbeam_output/classify/kraken/NA-rhizo-3_S57-taxa.tsv -o /home/collin/mt-meta-bracken/NA-rhizo-3-species.bracken -r 150 -l S -t 10

-------------------------
COMBINE BRACKEN OUTPUTS
-------------------------
cd /home/collin/mt-meta-bracken/
python2 /datadisk1/Users/Collin/bracken/analysis_scripts/combine_bracken_outputs.py --files *phylum.bracken -o bracken_phylum_all
python2 /datadisk1/Users/Collin/bracken/analysis_scripts/combine_bracken_outputs.py --files *genera.bracken -o bracken_genera_all
python2 /datadisk1/Users/Collin/bracken/analysis_scripts/combine_bracken_outputs.py --files *species.bracken -o bracken_species_all

----COUNT CLEANED READS TO GET HOST CONTAMINATION RATIO----

echo $(zcat NA-rhizo-1_S55_1.fastq.gz|wc -l)/4|bc
echo $(zcat NA-rhizo-2_S56_1.fastq.gz|wc -l)/4|bc
echo $(zcat NA-rhizo-3_S57_1.fastq.gz|wc -l)/4|bc

echo $(zcat CA-rhizo-1_S52_1.fastq.gz|wc -l)/4|bc
echo $(zcat CA-rhizo-2_S53_1.fastq.gz|wc -l)/4|bc
echo $(zcat CA-rhizo-3_S54_1.fastq.gz|wc -l)/4|bc

echo $(zcat CA-leaf-1_S46_1.fastq.gz|wc -l)/4|bc
echo $(zcat CA-leaf-2_S47_1.fastq.gz|wc -l)/4|bc
echo $(zcat CA-leaf-3_S48_1.fastq.gz|wc -l)/4|bc

echo $(zcat NA-leaf-1_S49_1.fastq.gz|wc -l)/4|bc
echo $(zcat NA-leaf-2_S50_1.fastq.gz|wc -l)/4|bc
echo $(zcat NA-leaf-3_S51_1.fastq.gz|wc -l)/4|bc


----Kraken-Biom----
# Convert Bracken reports into .biom files for diversity analysis using the phyloseq package in R
# Install the tool
pip install kraken-biom

# This worked using bracken outputs in the same format as the Kraken2 outputs, not the actual Bracken output file
cd /home/collin/sunbeam-dev/meta/sunbeam_output/classify/kraken/
kraken-biom *_bracken_* -o bracken.biom --fmt json

# Species
kraken-biom *_bracken_species.tsv -o bracken2.biom --fmt json

cd /home/collin/sunbeam-dev/meta/sunbeam_output/classify/kraken/
kraken-biom CA-leaf-1_S46-taxa_bracken_species.tsv CA-leaf-2_S47-taxa_bracken_species.tsv CA-leaf-3_S48-taxa_bracken_species.tsv NA-leaf-1_S49-taxa_bracken_species.tsv NA-leaf-2_S50-taxa_bracken_species.tsv NA-leaf-3_S51-taxa_bracken_species.tsv -o leaf.biom --fmt json

kraken-biom CA-rhizo-1_S52-taxa_bracken_species.tsv CA-rhizo-2_S53-taxa_bracken_species.tsv CA-rhizo-3_S54-taxa_bracken_species.tsv NA-rhizo-1_S55-taxa_bracken_species.tsv NA-rhizo-2_S56-taxa_bracken_species.tsv NA-rhizo-3_S57-taxa_bracken_species.tsv -o rhizo.biom --fmt json

---------------
----HUMAnN3----
---------------

# Concatenate paired end reads
cat sample_R1.fq sample_R2.fq > merge_sample.fq

cat CA-leaf-1_S46_1.fastq.gz CA-leaf-1_S46_2.fastq.gz > /home/collin/humann/CA-leaf-1.fastq.gz
cat CA-leaf-2_S47_1.fastq.gz CA-leaf-2_S47_2.fastq.gz > /home/collin/humann/CA-leaf-2.fastq.gz
cat CA-leaf-3_S48_1.fastq.gz CA-leaf-3_S48_2.fastq.gz > /home/collin/humann/CA-leaf-3.fastq.gz

cat NA-leaf-1_S49_1.fastq.gz NA-leaf-1_S49_2.fastq.gz > /home/collin/humann/NA-leaf-1.fastq.gz
cat NA-leaf-2_S50_1.fastq.gz NA-leaf-2_S50_2.fastq.gz > /home/collin/humann/NA-leaf-2.fastq.gz
cat NA-leaf-3_S51_1.fastq.gz NA-leaf-3_S51_2.fastq.gz > /home/collin/humann/NA-leaf-3.fastq.gz

cat CA-rhizo-1_S52_1.fastq.gz CA-rhizo-1_S52_2.fastq.gz > /home/collin/humann/CA-rhizo-1.fastq.gz
cat CA-rhizo-2_S53_1.fastq.gz CA-rhizo-2_S53_2.fastq.gz > /home/collin/humann/CA-rhizo-2.fastq.gz
cat CA-rhizo-3_S54_1.fastq.gz CA-rhizo-3_S54_2.fastq.gz > /home/collin/humann/CA-rhizo-3.fastq.gz

cat NA-rhizo-1_S55_1.fastq.gz NA-rhizo-1_S55_2.fastq.gz > /home/collin/humann/NA-rhizo-1.fastq.gz
cat NA-rhizo-2_S56_1.fastq.gz NA-rhizo-2_S56_2.fastq.gz > /home/collin/humann/NA-rhizo-2.fastq.gz
cat NA-rhizo-3_S57_1.fastq.gz NA-rhizo-3_S57_2.fastq.gz > /home/collin/humann/NA-rhizo-3.fastq.gz

# Running HUMAnN3

-----------------------LEAF----------------------------------

humann -i CA-leaf-1.fastq.gz -o /home/collin/humann/leaf --threads 10 --input-format fastq.gz  --metaphlan-options "--bowtie2db /datadisk1/Bioinformatics_programs/MetaPhlAn/MetaPhlAn_database/ --stat_q 0 --bt2_ps very-sensitive-local" --protein-database /datadisk1/Bioinformatics_programs/humann-3.0.0/humann_databases/uniref --nucleotide-subject-coverage-threshold 5.0 --bowtie-options "-D 20 -R 3 -N 1 -L 20 -i S,1,0.50 --local" --translated-subject-coverage-threshold 5.0

humann -i CA-leaf-2.fastq.gz -o /home/collin/humann/leaf --threads 10 --input-format fastq.gz  --metaphlan-options "--bowtie2db /datadisk1/Bioinformatics_programs/MetaPhlAn/MetaPhlAn_database/ --stat_q 0 --bt2_ps very-sensitive-local" --protein-database /datadisk1/Bioinformatics_programs/humann-3.0.0/humann_databases/uniref --nucleotide-subject-coverage-threshold 5.0 --bowtie-options "-D 20 -R 3 -N 1 -L 20 -i S,1,0.50 --local" --translated-subject-coverage-threshold 5.0

humann -i CA-leaf-3.fastq.gz -o /home/collin/humann/leaf --threads 10 --input-format fastq.gz  --metaphlan-options "--bowtie2db /datadisk1/Bioinformatics_programs/MetaPhlAn/MetaPhlAn_database/ --stat_q 0 --bt2_ps very-sensitive-local" --protein-database /datadisk1/Bioinformatics_programs/humann-3.0.0/humann_databases/uniref --nucleotide-subject-coverage-threshold 5.0 --bowtie-options "-D 20 -R 3 -N 1 -L 20 -i S,1,0.50 --local" --translated-subject-coverage-threshold 5.0

humann -i NA-leaf-1.fastq.gz -o /home/collin/humann/leaf --threads 10 --input-format fastq.gz  --metaphlan-options "--bowtie2db /datadisk1/Bioinformatics_programs/MetaPhlAn/MetaPhlAn_database/ --stat_q 0 --bt2_ps very-sensitive-local" --protein-database /datadisk1/Bioinformatics_programs/humann-3.0.0/humann_databases/uniref --nucleotide-subject-coverage-threshold 5.0 --bowtie-options "-D 20 -R 3 -N 1 -L 20 -i S,1,0.50 --local" --translated-subject-coverage-threshold 5.0

humann -i NA-leaf-2.fastq.gz -o /home/collin/humann/leaf --threads 10 --input-format fastq.gz  --metaphlan-options "--bowtie2db /datadisk1/Bioinformatics_programs/MetaPhlAn/MetaPhlAn_database/ --stat_q 0 --bt2_ps very-sensitive-local" --protein-database /datadisk1/Bioinformatics_programs/humann-3.0.0/humann_databases/uniref --nucleotide-subject-coverage-threshold 5.0 --bowtie-options "-D 20 -R 3 -N 1 -L 20 -i S,1,0.50 --local" --translated-subject-coverage-threshold 5.0

humann -i NA-leaf-3.fastq.gz -o /home/collin/humann/leaf --threads 10 --input-format fastq.gz  --metaphlan-options "--bowtie2db /datadisk1/Bioinformatics_programs/MetaPhlAn/MetaPhlAn_database/ --stat_q 0 --bt2_ps very-sensitive-local" --protein-database /datadisk1/Bioinformatics_programs/humann-3.0.0/humann_databases/uniref --nucleotide-subject-coverage-threshold 5.0 --bowtie-options "-D 20 -R 3 -N 1 -L 20 -i S,1,0.50 --local" --translated-subject-coverage-threshold 5.0

------------------------RHIZO---------------------------------------------------

humann -i CA-rhizo-1.fastq.gz -o /home/collin/humann/rhizo --threads 10 --input-format fastq.gz  --metaphlan-options "--bowtie2db /datadisk1/Bioinformatics_programs/MetaPhlAn/MetaPhlAn_database/ --stat_q 0 --bt2_ps very-sensitive-local" --protein-database /datadisk1/Bioinformatics_programs/humann-3.0.0/humann_databases/uniref --nucleotide-subject-coverage-threshold 5.0 --bowtie-options "-D 20 -R 3 -N 1 -L 20 -i S,1,0.50 --local" --translated-subject-coverage-threshold 5.0

humann -i CA-rhizo-2.fastq.gz -o /home/collin/humann/rhizo --threads 10 --input-format fastq.gz  --metaphlan-options "--bowtie2db /datadisk1/Bioinformatics_programs/MetaPhlAn/MetaPhlAn_database/ --stat_q 0 --bt2_ps very-sensitive-local" --protein-database /datadisk1/Bioinformatics_programs/humann-3.0.0/humann_databases/uniref --nucleotide-subject-coverage-threshold 5.0 --bowtie-options "-D 20 -R 3 -N 1 -L 20 -i S,1,0.50 --local" --translated-subject-coverage-threshold 5.0

humann -i CA-rhizo-3.fastq.gz -o /home/collin/humann/rhizo --threads 10 --input-format fastq.gz  --metaphlan-options "--bowtie2db /datadisk1/Bioinformatics_programs/MetaPhlAn/MetaPhlAn_database/ --stat_q 0 --bt2_ps very-sensitive-local" --protein-database /datadisk1/Bioinformatics_programs/humann-3.0.0/humann_databases/uniref --nucleotide-subject-coverage-threshold 5.0 --bowtie-options "-D 20 -R 3 -N 1 -L 20 -i S,1,0.50 --local" --translated-subject-coverage-threshold 5.0

humann -i NA-rhizo-1.fastq.gz -o /home/collin/humann/rhizo --threads 10 --input-format fastq.gz  --metaphlan-options "--bowtie2db /datadisk1/Bioinformatics_programs/MetaPhlAn/MetaPhlAn_database/ --stat_q 0 --bt2_ps very-sensitive-local" --protein-database /datadisk1/Bioinformatics_programs/humann-3.0.0/humann_databases/uniref --nucleotide-subject-coverage-threshold 5.0 --bowtie-options "-D 20 -R 3 -N 1 -L 20 -i S,1,0.50 --local" --translated-subject-coverage-threshold 5.0

humann -i NA-rhizo-2.fastq.gz -o /home/collin/humann/rhizo --threads 10 --input-format fastq.gz  --metaphlan-options "--bowtie2db /datadisk1/Bioinformatics_programs/MetaPhlAn/MetaPhlAn_database/ --stat_q 0 --bt2_ps very-sensitive-local" --protein-database /datadisk1/Bioinformatics_programs/humann-3.0.0/humann_databases/uniref --nucleotide-subject-coverage-threshold 5.0 --bowtie-options "-D 20 -R 3 -N 1 -L 20 -i S,1,0.50 --local" --translated-subject-coverage-threshold 5.0

humann -i NA-rhizo-3.fastq.gz -o /home/collin/humann/rhizo --threads 10 --input-format fastq.gz  --metaphlan-options "--bowtie2db /datadisk1/Bioinformatics_programs/MetaPhlAn/MetaPhlAn_database/ --stat_q 0 --bt2_ps very-sensitive-local" --protein-database /datadisk1/Bioinformatics_programs/humann-3.0.0/humann_databases/uniref --nucleotide-subject-coverage-threshold 5.0 --bowtie-options "-D 20 -R 3 -N 1 -L 20 -i S,1,0.50 --local" --translated-subject-coverage-threshold 5.0

# Regroup and rename gene family tables to Pfam
----
LEAF
----

humann_regroup_table --input /home/collin/humann/leaf/CA-leaf-1_genefamilies.tsv --groups uniref90_pfam --output /home/collin/humann/leaf/pfam/CA-leaf-1_genefamilies_regroup.tsv
humann_renorm_table --input /home/collin/humann/leaf/pfam/CA-leaf-1_genefamilies_regroup.tsv --output /home/collin/humann/leaf/pfam/CA-leaf-1_genefamilies_regroup_renorm-cpm.tsv --units cpm --special n
humann_rename_table --input /home/collin/humann/leaf/pfam/CA-leaf-1_genefamilies_regroup_renorm-cpm.tsv --output /home/collin/humann/leaf/pfam/CA-leaf-1_genefamilies_regroup_renorm-cpm_rename.tsv --names pfam

humann_regroup_table --input /home/collin/humann/leaf/CA-leaf-2_genefamilies.tsv --groups uniref90_pfam --output /home/collin/humann/leaf/pfam/CA-leaf-2_genefamilies_regroup.tsv
humann_renorm_table --input /home/collin/humann/leaf/pfam/CA-leaf-2_genefamilies_regroup.tsv --output /home/collin/humann/leaf/pfam/CA-leaf-2_genefamilies_regroup_renorm-cpm.tsv --units cpm --special n
humann_rename_table --input /home/collin/humann/leaf/pfam/CA-leaf-2_genefamilies_regroup_renorm-cpm.tsv --output /home/collin/humann/leaf/pfam/CA-leaf-2_genefamilies_regroup_renorm-cpm_rename.tsv --names pfam

humann_regroup_table --input /home/collin/humann/leaf/CA-leaf-3_genefamilies.tsv --groups uniref90_pfam --output /home/collin/humann/leaf/pfam/CA-leaf-3_genefamilies_regroup.tsv
humann_renorm_table --input /home/collin/humann/leaf/pfam/CA-leaf-3_genefamilies_regroup.tsv --output /home/collin/humann/leaf/pfam/CA-leaf-3_genefamilies_regroup_renorm-cpm.tsv --units cpm --special n
humann_rename_table --input /home/collin/humann/leaf/pfam/CA-leaf-3_genefamilies_regroup_renorm-cpm.tsv --output /home/collin/humann/leaf/pfam/CA-leaf-3_genefamilies_regroup_renorm-cpm_rename.tsv --names pfam

humann_regroup_table --input /home/collin/humann/leaf/NA-leaf-1_genefamilies.tsv --groups uniref90_pfam --output /home/collin/humann/leaf/pfam/NA-leaf-1_genefamilies_regroup.tsv
humann_renorm_table --input /home/collin/humann/leaf/pfam/NA-leaf-1_genefamilies_regroup.tsv --output /home/collin/humann/leaf/pfam/NA-leaf-1_genefamilies_regroup_renorm-cpm.tsv --units cpm --special n
humann_rename_table --input /home/collin/humann/leaf/pfam/NA-leaf-1_genefamilies_regroup_renorm-cpm.tsv --output /home/collin/humann/leaf/pfam/NA-leaf-1_genefamilies_regroup_renorm-cpm_rename.tsv --names pfam

humann_regroup_table --input /home/collin/humann/leaf/NA-leaf-2_genefamilies.tsv --groups uniref90_pfam --output /home/collin/humann/leaf/pfam/NA-leaf-2_genefamilies_regroup.tsv
humann_renorm_table --input /home/collin/humann/leaf/pfam/NA-leaf-2_genefamilies_regroup.tsv --output /home/collin/humann/leaf/pfam/NA-leaf-2_genefamilies_regroup_renorm-cpm.tsv --units cpm --special n
humann_rename_table --input /home/collin/humann/leaf/pfam/NA-leaf-2_genefamilies_regroup_renorm-cpm.tsv --output /home/collin/humann/leaf/pfam/NA-leaf-2_genefamilies_regroup_renorm-cpm_rename.tsv --names pfam

humann_regroup_table --input /home/collin/humann/leaf/NA-leaf-3_genefamilies.tsv --groups uniref90_pfam --output /home/collin/humann/leaf/pfam/NA-leaf-3_genefamilies_regroup.tsv
humann_renorm_table --input /home/collin/humann/leaf/pfam/NA-leaf-3_genefamilies_regroup.tsv --output /home/collin/humann/leaf/pfam/NA-leaf-3_genefamilies_regroup_renorm-cpm.tsv --units cpm --special n
humann_rename_table --input /home/collin/humann/leaf/pfam/NA-leaf-3_genefamilies_regroup_renorm-cpm.tsv --output /home/collin/humann/leaf/pfam/NA-leaf-3_genefamilies_regroup_renorm-cpm_rename.tsv --names pfam

# Join tables together and split to get unstratified
humann_join_tables --input /home/collin/humann/leaf/pfam/ --output /home/collin/humann/leaf/pfam/leaf_genefamilies_pfam_join.tsv --file_name genefamilies_regroup_renorm-cpm_rename
humann_split_stratified_table --input /home/collin/humann/leaf/pfam/leaf_genefamilies_pfam_join.tsv --output /home/collin/humann/leaf/pfam/split

# Redo without normalizing to use MaAsLin2 normalization instead
humann_regroup_table --input /home/collin/humann/leaf/CA-leaf-1_genefamilies.tsv --groups uniref90_pfam --output /home/collin/humann/leaf/nonorm-pfam/CA-leaf-1_genefamilies_regroup.tsv
humann_rename_table --input /home/collin/humann/leaf/nonorm-pfam/CA-leaf-1_genefamilies_regroup.tsv --output /home/collin/humann/leaf/nonorm-pfam/CA-leaf-1_genefamilies_regroup_rename.tsv --names pfam

humann_regroup_table --input /home/collin/humann/leaf/CA-leaf-2_genefamilies.tsv --groups uniref90_pfam --output /home/collin/humann/leaf/nonorm-pfam/CA-leaf-2_genefamilies_regroup.tsv
humann_rename_table --input /home/collin/humann/leaf/nonorm-pfam/CA-leaf-2_genefamilies_regroup.tsv --output /home/collin/humann/leaf/nonorm-pfam/CA-leaf-2_genefamilies_regroup_rename.tsv --names pfam

humann_regroup_table --input /home/collin/humann/leaf/CA-leaf-3_genefamilies.tsv --groups uniref90_pfam --output /home/collin/humann/leaf/nonorm-pfam/CA-leaf-3_genefamilies_regroup.tsv
humann_rename_table --input /home/collin/humann/leaf/nonorm-pfam/CA-leaf-3_genefamilies_regroup.tsv --output /home/collin/humann/leaf/nonorm-pfam/CA-leaf-3_genefamilies_regroup_rename.tsv --names pfam

humann_regroup_table --input /home/collin/humann/leaf/NA-leaf-1_genefamilies.tsv --groups uniref90_pfam --output /home/collin/humann/leaf/nonorm-pfam/NA-leaf-1_genefamilies_regroup.tsv
humann_rename_table --input /home/collin/humann/leaf/nonorm-pfam/NA-leaf-1_genefamilies_regroup.tsv --output /home/collin/humann/leaf/nonorm-pfam/NA-leaf-1_genefamilies_regroup_rename.tsv --names pfam

humann_regroup_table --input /home/collin/humann/leaf/NA-leaf-2_genefamilies.tsv --groups uniref90_pfam --output /home/collin/humann/leaf/nonorm-pfam/NA-leaf-2_genefamilies_regroup.tsv
humann_rename_table --input /home/collin/humann/leaf/nonorm-pfam/NA-leaf-2_genefamilies_regroup.tsv --output /home/collin/humann/leaf/nonorm-pfam/NA-leaf-2_genefamilies_regroup_rename.tsv --names pfam

humann_regroup_table --input /home/collin/humann/leaf/NA-leaf-3_genefamilies.tsv --groups uniref90_pfam --output /home/collin/humann/leaf/nonorm-pfam/NA-leaf-3_genefamilies_regroup.tsv
humann_rename_table --input /home/collin/humann/leaf/nonorm-pfam/NA-leaf-3_genefamilies_regroup.tsv --output /home/collin/humann/leaf/nonorm-pfam/NA-leaf-3_genefamilies_regroup_rename.tsv --names pfam

humann_join_tables --input /home/collin/humann/leaf/nonorm-pfam/ --output /home/collin/humann/leaf/nonorm-pfam/leaf_genefamilies_join.tsv --file_name genefamilies_regroup_rename
humann_split_stratified_table --input /home/collin/humann/leaf/nonorm-pfam/leaf_genefamilies_join.tsv --output /home/collin/humann/leaf/nonorm-pfam/

# now for the Rhizo
humann_regroup_table --input /home/collin/humann/rhizo/CA-rhizo-1_genefamilies.tsv --groups uniref90_pfam --output /home/collin/humann/rhizo/pfam/CA-rhizo-1_genefamilies_regroup.tsv
humann_renorm_table --input /home/collin/humann/rhizo/pfam/CA-rhizo-1_genefamilies_regroup.tsv --output /home/collin/humann/rhizo/pfam/CA-rhizo-1_genefamilies_regroup_renorm-cpm.tsv --units cpm --special n
humann_rename_table --input /home/collin/humann/rhizo/pfam/CA-rhizo-1_genefamilies_regroup_renorm-cpm.tsv --output /home/collin/humann/rhizo/pfam/CA-rhizo-1_genefamilies_regroup_renorm-cpm_rename.tsv --names pfam

humann_regroup_table --input /home/collin/humann/rhizo/CA-rhizo-2_genefamilies.tsv --groups uniref90_pfam --output /home/collin/humann/rhizo/pfam/CA-rhizo-2_genefamilies_regroup.tsv
humann_renorm_table --input /home/collin/humann/rhizo/pfam/CA-rhizo-2_genefamilies_regroup.tsv --output /home/collin/humann/rhizo/CA-rhizo-2_genefamilies_regroup_renorm-cpm.tsv --units cpm --special n
humann_rename_table --input /home/collin/humann/rhizo/pfam/CA-rhizo-2_genefamilies_regroup_renorm-cpm.tsv --output /home/collin/humann/rhizo/pfam/CA-rhizo-2_genefamilies_regroup_renorm-cpm_rename.tsv --names pfam

humann_regroup_table --input /home/collin/humann/rhizo/CA-rhizo-3_genefamilies.tsv --groups uniref90_pfam --output /home/collin/humann/rhizo/pfam/CA-rhizo-3_genefamilies_regroup.tsv
humann_renorm_table --input /home/collin/humann/rhizo/pfam/CA-rhizo-3_genefamilies_regroup.tsv --output /home/collin/humann/rhizo/pfam/CA-rhizo-3_genefamilies_regroup_renorm-cpm.tsv --units cpm --special n
humann_rename_table --input /home/collin/humann/rhizo/pfam/CA-rhizo-3_genefamilies_regroup_renorm-cpm.tsv --output /home/collin/humann/rhizo/pfam/CA-rhizo-3_genefamilies_regroup_renorm-cpm_rename.tsv --names pfam

humann_regroup_table --input /home/collin/humann/rhizo/NA-rhizo-1_genefamilies.tsv --groups uniref90_pfam --output /home/collin/humann/rhizo/pfam/NA-rhizo-1_genefamilies_regroup.tsv
humann_renorm_table --input /home/collin/humann/rhizo/pfam/NA-rhizo-1_genefamilies_regroup.tsv --output /home/collin/humann/rhizo/pfam/NA-rhizo-1_genefamilies_regroup_renorm-cpm.tsv --units cpm --special n
humann_rename_table --input /home/collin/humann/rhizo/pfam/NA-rhizo-1_genefamilies_regroup_renorm-cpm.tsv --output /home/collin/humann/rhizo/pfam/NA-rhizo-1_genefamilies_regroup_renorm-cpm_rename.tsv --names pfam

humann_regroup_table --input /home/collin/humann/rhizo/NA-rhizo-2_genefamilies.tsv --groups uniref90_pfam --output /home/collin/humann/rhizo/pfam/NA-rhizo-2_genefamilies_regroup.tsv
humann_renorm_table --input /home/collin/humann/rhizo/pfam/NA-rhizo-2_genefamilies_regroup.tsv --output /home/collin/humann/rhizo/pfam/NA-rhizo-2_genefamilies_regroup_renorm-cpm.tsv --units cpm --special n
humann_rename_table --input /home/collin/humann/rhizo/pfam/NA-rhizo-2_genefamilies_regroup_renorm-cpm.tsv --output /home/collin/humann/rhizo/pfam/NA-rhizo-2_genefamilies_regroup_renorm-cpm_rename.tsv --names pfam

humann_regroup_table --input /home/collin/humann/rhizo/NA-rhizo-3_genefamilies.tsv --groups uniref90_pfam --output /home/collin/humann/rhizo/pfam/NA-rhizo-3_genefamilies_regroup.tsv
humann_renorm_table --input /home/collin/humann/rhizo/pfam/NA-rhizo-3_genefamilies_regroup.tsv --output /home/collin/humann/rhizo/pfam/NA-rhizo-3_genefamilies_regroup_renorm-cpm.tsv --units cpm --special n
humann_rename_table --input /home/collin/humann/rhizo/pfam/NA-rhizo-3_genefamilies_regroup_renorm-cpm.tsv --output /home/collin/humann/rhizo/pfam/NA-rhizo-3_genefamilies_regroup_renorm-cpm_rename.tsv --names pfam


humann_join_tables --input /home/collin/humann/rhizo/pfam/ --output /home/collin/humann/rhizo/pfam/rhizo_genefamilies_pfam_join.tsv --file_name genefamilies_regroup_renorm-cpm_rename
humann_split_stratified_table --input /home/collin/humann/rhizo/pfam/rhizo_genefamilies_pfam_join.tsv --output /home/collin/humann/rhizo/pfam/split/

# without normzalization
humann_regroup_table --input /home/collin/humann/rhizo/CA-rhizo-1_genefamilies.tsv --groups uniref90_pfam --output /home/collin/humann/rhizo/nonorm-pfam/CA-rhizo-1_genefamilies_regroup.tsv
humann_rename_table --input /home/collin/humann/rhizo/nonorm-pfam/CA-rhizo-1_genefamilies_regroup.tsv --output /home/collin/humann/rhizo/nonorm-pfam/CA-rhizo-1_genefamilies_regroup_rename.tsv --names pfam

humann_regroup_table --input /home/collin/humann/rhizo/CA-rhizo-2_genefamilies.tsv --groups uniref90_pfam --output /home/collin/humann/rhizo/nonorm-pfam/CA-rhizo-2_genefamilies_regroup.tsv
humann_rename_table --input /home/collin/humann/rhizo/nonorm-pfam/CA-rhizo-2_genefamilies_regroup.tsv --output /home/collin/humann/rhizo/nonorm-pfam/CA-rhizo-2_genefamilies_regroup_rename.tsv --names pfam

humann_regroup_table --input /home/collin/humann/rhizo/CA-rhizo-3_genefamilies.tsv --groups uniref90_pfam --output /home/collin/humann/rhizo/nonorm-pfam/CA-rhizo-3_genefamilies_regroup.tsv
humann_rename_table --input /home/collin/humann/rhizo/nonorm-pfam/CA-rhizo-3_genefamilies_regroup.tsv --output /home/collin/humann/rhizo/nonorm-pfam/CA-rhizo-3_genefamilies_regroup_rename.tsv --names pfam

humann_regroup_table --input /home/collin/humann/rhizo/NA-rhizo-1_genefamilies.tsv --groups uniref90_pfam --output /home/collin/humann/rhizo/nonorm-pfam/NA-rhizo-1_genefamilies_regroup.tsv
humann_rename_table --input /home/collin/humann/rhizo/nonorm-pfam/NA-rhizo-1_genefamilies_regroup.tsv --output /home/collin/humann/rhizo/nonorm-pfam/NA-rhizo-1_genefamilies_regroup_rename.tsv --names pfam

humann_regroup_table --input /home/collin/humann/rhizo/NA-rhizo-2_genefamilies.tsv --groups uniref90_pfam --output /home/collin/humann/rhizo/nonorm-pfam/NA-rhizo-2_genefamilies_regroup.tsv
humann_rename_table --input /home/collin/humann/rhizo/nonorm-pfam/NA-rhizo-2_genefamilies_regroup.tsv --output /home/collin/humann/rhizo/nonorm-pfam/NA-rhizo-2_genefamilies_regroup_rename.tsv --names pfam

humann_regroup_table --input /home/collin/humann/rhizo/NA-rhizo-3_genefamilies.tsv --groups uniref90_pfam --output /home/collin/humann/rhizo/nonorm-pfam/NA-rhizo-3_genefamilies_regroup.tsv
humann_rename_table --input /home/collin/humann/rhizo/nonorm-pfam/NA-rhizo-3_genefamilies_regroup.tsv --output /home/collin/humann/rhizo/nonorm-pfam/NA-rhizo-3_genefamilies_regroup_rename.tsv --names pfam

humann_join_tables --input /home/collin/humann/rhizo/nonorm-pfam/ --output /home/collin/humann/rhizo/nonorm-pfam/rhizo_genefamilies_join.tsv --file_name genefamilies_regroup_rename
humann_split_stratified_table --input /home/collin/humann/rhizo/nonorm-pfam/rhizo_genefamilies_join.tsv --output /home/collin/humann/rhizo/nonorm-pfam/

# pathways now
-----
LEAF
-----
humann_renorm_table --input /home/collin/humann/leaf/CA-leaf-1_pathabundance.tsv --output /home/collin/humann/leaf/CA-leaf-1_pathabundance_renorm-cpm.tsv --units cpm
humann_renorm_table --input /home/collin/humann/leaf/CA-leaf-2_pathabundance.tsv --output /home/collin/humann/leaf/CA-leaf-2_pathabundance_renorm-cpm.tsv --units cpm 
humann_renorm_table --input /home/collin/humann/leaf/CA-leaf-3_pathabundance.tsv --output /home/collin/humann/leaf/CA-leaf-3_pathabundance_renorm-cpm.tsv --units cpm

humann_renorm_table --input /home/collin/humann/leaf/NA-leaf-1_pathabundance.tsv --output /home/collin/humann/leaf/NA-leaf-1_pathabundance_renorm-cpm.tsv --units cpm
humann_renorm_table --input /home/collin/humann/leaf/NA-leaf-2_pathabundance.tsv --output /home/collin/humann/leaf/NA-leaf-2_pathabundance_renorm-cpm.tsv --units cpm
humann_renorm_table --input /home/collin/humann/leaf/NA-leaf-3_pathabundance.tsv --output /home/collin/humann/leaf/NA-leaf-3_pathabundance_renorm-cpm.tsv --units cpm

humann_join_tables --input /home/collin/humann/leaf/ --output /home/collin/humann/leaf/leaf_pathabundance_join.tsv --file_name pathabundance_renorm-cpm

# without normalization
humann_join_tables --input /home/collin/humann/leaf/ --output /home/collin/humann/leaf/nonorm-path/leaf_pathabundance_join.tsv --file_name pathabundance.tsv
humann_split_stratified_table --input /home/collin/humann/leaf/nonorm-path/leaf_pathabundance_join.tsv --output /home/collin/humann/leaf/nonorm-path/

# redo without specials
humann_renorm_table --input /home/collin/humann/leaf/CA-leaf-1_pathabundance.tsv --output /home/collin/humann/leaf/CA-leaf-1_pathabundance_renorm-cpm-nospec.tsv --units cpm --special n
humann_renorm_table --input /home/collin/humann/leaf/CA-leaf-2_pathabundance.tsv --output /home/collin/humann/leaf/CA-leaf-2_pathabundance_renorm-cpm-nospec.tsv --units cpm --special n
humann_renorm_table --input /home/collin/humann/leaf/CA-leaf-3_pathabundance.tsv --output /home/collin/humann/leaf/CA-leaf-3_pathabundance_renorm-cpm-nospec.tsv --units cpm --special n

humann_renorm_table --input /home/collin/humann/leaf/NA-leaf-1_pathabundance.tsv --output /home/collin/humann/leaf/NA-leaf-1_pathabundance_renorm-cpm-nospec.tsv --units cpm --special n
humann_renorm_table --input /home/collin/humann/leaf/NA-leaf-2_pathabundance.tsv --output /home/collin/humann/leaf/NA-leaf-2_pathabundance_renorm-cpm-nospec.tsv --units cpm --special n
humann_renorm_table --input /home/collin/humann/leaf/NA-leaf-3_pathabundance.tsv --output /home/collin/humann/leaf/NA-leaf-3_pathabundance_renorm-cpm-nospec.tsv --units cpm --special n

humann_join_tables --input /home/collin/humann/leaf/ --output /home/collin/humann/leaf/leaf_pathabundance-nospec_join.tsv --file_name pathabundance_renorm-cpm-nospec

------
RHIZO
------

humann_renorm_table --input /home/collin/humann/rhizo/CA-rhizo-1_pathabundance.tsv --output /home/collin/humann/rhizo/CA-rhizo-1_pathabundance_renorm-cpm.tsv --units cpm
humann_renorm_table --input /home/collin/humann/rhizo/CA-rhizo-2_pathabundance.tsv --output /home/collin/humann/rhizo/CA-rhizo-2_pathabundance_renorm-cpm.tsv --units cpm
humann_renorm_table --input /home/collin/humann/rhizo/CA-rhizo-3_pathabundance.tsv --output /home/collin/humann/rhizo/CA-rhizo-3_pathabundance_renorm-cpm.tsv --units cpm

humann_renorm_table --input /home/collin/humann/rhizo/NA-rhizo-1_pathabundance.tsv --output /home/collin/humann/rhizo/NA-rhizo-1_pathabundance_renorm-cpm.tsv --units cpm
humann_renorm_table --input /home/collin/humann/rhizo/NA-rhizo-2_pathabundance.tsv --output /home/collin/humann/rhizo/NA-rhizo-2_pathabundance_renorm-cpm.tsv --units cpm
humann_renorm_table --input /home/collin/humann/rhizo/NA-rhizo-3_pathabundance.tsv --output /home/collin/humann/rhizo/NA-rhizo-3_pathabundance_renorm-cpm.tsv --units cpm

humann_join_tables --input /home/collin/humann/rhizo/ --output /home/collin/humann/rhizo/rhizo_pathabundance_join.tsv --file_name pathabundance_renorm-cpm

# without normalization
humann_join_tables --input /home/collin/humann/rhizo/ --output /home/collin/humann/rhizo/nonorm-path/rhizo_pathabundance_join.tsv --file_name pathabundance.tsv
humann_split_stratified_table --input /home/collin/humann/rhizo/nonorm-path/rhizo_pathabundance_join.tsv --output /home/collin/humann/rhizo/nonorm-path/

# redo without specials
humann_renorm_table --input /home/collin/humann/rhizo/CA-rhizo-1_pathabundance.tsv --output /home/collin/humann/rhizo/CA-rhizo-1_pathabundance_renorm-cpm-nospec.tsv --units cpm --special n
humann_renorm_table --input /home/collin/humann/rhizo/CA-rhizo-2_pathabundance.tsv --output /home/collin/humann/rhizo/CA-rhizo-2_pathabundance_renorm-cpm-nospec.tsv --units cpm --special n
humann_renorm_table --input /home/collin/humann/rhizo/CA-rhizo-3_pathabundance.tsv --output /home/collin/humann/rhizo/CA-rhizo-3_pathabundance_renorm-cpm-nospec.tsv --units cpm --special n

humann_renorm_table --input /home/collin/humann/rhizo/NA-rhizo-1_pathabundance.tsv --output /home/collin/humann/rhizo/NA-rhizo-1_pathabundance_renorm-cpm-nospec.tsv --units cpm --special n
humann_renorm_table --input /home/collin/humann/rhizo/NA-rhizo-2_pathabundance.tsv --output /home/collin/humann/rhizo/NA-rhizo-2_pathabundance_renorm-cpm-nospec.tsv --units cpm --special n
humann_renorm_table --input /home/collin/humann/rhizo/NA-rhizo-3_pathabundance.tsv --output /home/collin/humann/rhizo/NA-rhizo-3_pathabundance_renorm-cpm-nospec.tsv --units cpm --special n

humann_join_tables --input /home/collin/humann/rhizo/ --output /home/collin/humann/rhizo/rhizo_pathabundance-nospec_join.tsv --file_name pathabundance_renorm-cpm-nospec

---------------------------------------------------------That was the metagenomic stuff----------------------------------------------------------

# now time for amplicon data using QIIME2
# sidenote, ANCOM in QIIME2 not good, do separately in R with ANCOM-BC

# This is for building the UNITE classifier for fungal ITS sequences

# Training ITS classifier using latest UNITE 2021 release (Version 8.3)

# download
wget https://files.plutof.ut.ee/public/orig/B3/05/B3054DF783AC61A0C3BD0FDEB0516EC394934809AAE43CA0F3081C0A184FAA39.tgz

# unzip
tar xzf B3054DF783AC61A0C3BD0FDEB0516EC394934809AAE43CA0F3081C0A184FAA39.tgz

# go into developer directory
cd /datadisk1/Users/Collin/amplicons/060821CJits-275278009/sh_qiime_release_s_10.05.2021/developer/

# fix potential importing errors
awk '/^>/ {print($0)}; /^[^>]/ {print(toupper($0))}' sh_refs_qiime_ver8_99_s_10.05.2021_dev.fasta | tr -d ' ' > sh_refs_qiime_ver8_99_s_10.05.2021_dev_uppercase.fasta

# import into QIIME2
qiime tools import \
--type FeatureData[Sequence] \
--input-path "/datadisk1/Users/Collin/amplicons/060821CJits-275278009/sh_qiime_release_s_10.05.2021/developer/sh_refs_qiime_ver8_99_s_10.05.2021_dev_uppercase.fasta" \
--output-path unite-ver8-seqs_99_s_10.05.2021.qza

# import taxonomy file
qiime tools import \
--type FeatureData[Taxonomy] \
--input-path "/datadisk1/Users/Collin/amplicons/060821CJits-275278009/sh_qiime_release_s_10.05.2021/developer/sh_taxonomy_qiime_ver8_99_s_10.05.2021_dev.txt" \
--output-path unite-ver8-taxonomy_99_s_10.05.2021.qza \
--input-format HeaderlessTSVTaxonomyFormat

# train the classifier
qiime feature-classifier fit-classifier-naive-bayes \
--i-reference-reads unite-ver8-seqs_99_s_10.05.2021.qza \
--i-reference-taxonomy unite-ver8-taxonomy_99_s_10.05.2021.qza \
--o-classifier unite-ver8-99-s-classifier-10.05.2021.qza

# assign taxa
qiime feature-classifier classify-sklearn \
  --i-classifier unite-ver8-99-s-classifier-10.05.2021.qza \
  --i-reads rep-seqs.qza \
  --o-classification taxonomy.qza

# QIIME2 workflow starts here

# Installing qiime2
conda update conda
conda install wget
wget https://data.qiime2.org/distro/core/qiime2-2021.4-py38-linux-conda.yml
conda env create -n qiime2-2021.4 --file qiime2-2021.4-py38-linux-conda.yml
rm qiime2-2021.4-py38-linux-conda.yml
conda activate qiime2-2021.4
qiime --help
conda activate qiime2-2021.4
conda info

# ITS FUNGI
# activate qiime2
conda activate qiime2-2021.4

# Import data
# leaf
qiime tools import \
  --type 'SampleData[PairedEndSequencesWithQuality]' \
  --input-path /home/collin/amplicons/ITS/leaf/seqs/ \
  --input-format CasavaOneEightSingleLanePerSampleDirFmt \
  --output-path paired-end-demux.qza

# rhizo
qiime tools import \
  --type 'SampleData[PairedEndSequencesWithQuality]' \
  --input-path /home/collin/amplicons/ITS/rhizo/seqs/ \
  --input-format CasavaOneEightSingleLanePerSampleDirFmt \
  --output-path paired-end-demux.qza

# summarize to get p-trunc-len value
qiime demux summarize \
  --i-data paired-end-demux.qza \
  --o-visualization demux.qzv

# Run dada2
qiime dada2 denoise-single \
  --i-demultiplexed-seqs paired-end-demux.qza \
  --p-trim-left 0 \
  --p-trunc-len 0 \
  --o-representative-sequences rep-seqs.qza \
  --o-table table.qza \
  --o-denoising-stats stats-dada2.qza

# view data
qiime metadata tabulate \
  --m-input-file stats-dada2.qza \
  --o-visualization stats-dada2.qzv

# assign taxonomy
qiime feature-classifier classify-sklearn \
  --i-classifier "/datadisk1/Users/Collin/amplicons/060821CJits-275278009/unite-ver8-99-s-classifier-10.05.2021.qza" \
  --i-reads rep-seqs.qza \
  --o-classification taxonomy.qza

# build bar plots
qiime taxa barplot \
  --i-table table.qza \
  --i-taxonomy taxonomy.qza \
  --m-metadata-file sample-metadata.txt \
  --o-visualization taxa-bar-plots.qzv

# summarize
qiime feature-table summarize \
  --i-table table.qza \
  --o-visualization table.qzv

# make phylogeny for diversity analysis
qiime phylogeny align-to-tree-mafft-fasttree \
  --i-sequences rep-seqs.qza \
  --o-alignment aligned-rep-seqs.qza \
  --o-masked-alignment masked-aligned-rep-seqs.qza \
  --o-tree unrooted-tree.qza \
  --o-rooted-tree rooted-tree.qza

# alpha rarefaction
# max depth for leaf 77441
# max depth for rhizo 52947
qiime diversity alpha-rarefaction \
  --i-table table.qza \
  --i-phylogeny rooted-tree.qza \
  --p-max-depth 52947 \
  --m-metadata-file sample-metadata.txt \
  --o-visualization alpha-rarefaction.qzv

# build diversity metrics (sampling depth variable, get from table.qzv)
# 38570 for ITS Leaf
# 28652 for ITS Rhizo
qiime diversity core-metrics-phylogenetic \
  --i-phylogeny rooted-tree.qza \
  --i-table table.qza \
  --p-sampling-depth 28652 \
  --m-metadata-file sample-metadata.txt \
  --output-dir core-metrics-results

# test alpha diversity
qiime diversity alpha-group-significance \
  --i-alpha-diversity core-metrics-results/faith_pd_vector.qza \
  --m-metadata-file sample-metadata.txt \
  --o-visualization core-metrics-results/faith-pd-group-significance.qzv

qiime diversity alpha-group-significance \
  --i-alpha-diversity core-metrics-results/evenness_vector.qza \
  --m-metadata-file sample-metadata.txt \
  --o-visualization core-metrics-results/evenness-group-significance.qzv

qiime diversity alpha-group-significance \
  --i-alpha-diversity core-metrics-results/shannon_vector.qza \
  --m-metadata-file sample-metadata.txt \
  --o-visualization core-metrics-results/shannon-group-significance.qzv

# test beta diversity
qiime diversity beta-group-significance \
  --i-distance-matrix core-metrics-results/unweighted_unifrac_distance_matrix.qza \
  --m-metadata-file sample-metadata.txt \
  --m-metadata-column condition \
  --o-visualization core-metrics-results/unweighted-unifrac-condition-significance.qzv \
  --p-pairwise

qiime diversity beta-group-significance \
  --i-distance-matrix core-metrics-results/weighted_unifrac_distance_matrix.qza \
  --m-metadata-file sample-metadata.txt \
  --m-metadata-column condition \
  --o-visualization core-metrics-results/weighted-unifrac-condition-significance.qzv \
  --p-pairwise

qiime diversity beta-group-significance \
  --i-distance-matrix core-metrics-results/bray_curtis_distance_matrix.qza \
  --m-metadata-file sample-metadata.txt \
  --m-metadata-column condition \
  --o-visualization core-metrics-results/bray-curtis-condition-significance.qzv \
  --p-pairwise

qiime diversity beta-group-significance \
  --i-distance-matrix core-metrics-results/jaccard_distance_matrix.qza \
  --m-metadata-file sample-metadata.txt \
  --m-metadata-column condition \
  --o-visualization core-metrics-results/jaccard-condition-significance.qzv \
  --p-pairwise

--------------------------------------------------------------------------------------------------------------

# 16S BACTERIA
# activate qiime2
conda activate qiime2-2021.4

# Import data
# rhizo
qiime tools import \
  --type 'SampleData[PairedEndSequencesWithQuality]' \
  --input-path /home/collin/amplicons/16S/rhizo/seqs/ \
  --input-format CasavaOneEightSingleLanePerSampleDirFmt \
  --output-path paired-end-demux.qza

# leaf
qiime tools import \
  --type 'SampleData[PairedEndSequencesWithQuality]' \
  --input-path /home/collin/amplicons/16S/leaf/seqs/ \
  --input-format CasavaOneEightSingleLanePerSampleDirFmt \
  --output-path paired-end-demux.qza

# summarize to get p-trunc-len value
qiime demux summarize \
  --i-data paired-end-demux.qza \
  --o-visualization demux.qzv

# Run dada2
qiime dada2 denoise-single \
  --i-demultiplexed-seqs paired-end-demux.qza \
  --p-trim-left 0 \
  --p-trunc-len 0 \
  --o-representative-sequences rep-seqs.qza \
  --o-table table.qza \
  --o-denoising-stats stats-dada2.qza

# view data
qiime metadata tabulate \
  --m-input-file stats-dada2.qza \
  --o-visualization stats-dada2.qzv

# assign taxa using SILVA (release 138) 99% OTUs full length 16S
# SILVA releases a new version every year or two while Greengenes has not been updated since 2012
qiime feature-classifier classify-sklearn \
  --i-classifier "/datadisk1/Users/Collin/amplicons/060821CJillcus515F-274290054/silva-138-99-nb-classifier.qza" \
  --i-reads rep-seqs.qza \
  --o-classification taxonomy.qza

# build bar plots
qiime taxa barplot \
  --i-table table.qza \
  --i-taxonomy taxonomy.qza \
  --m-metadata-file sample-metadata.txt \
  --o-visualization taxa-bar-plots.qzv

# likely don't need to filter out sequences in the rhizo samples, only leaf
# filter out chloroplast sequences
qiime feature-table filter-features \
  --i-table table.qza \
  --m-metadata-file taxonomy.qza \
  --p-where "Taxon NOT LIKE '%Chloroplast%'" \
  --o-filtered-table table-without-Chloroplast.qza

# filter out mitochondria sequences (Rickettsiales)
qiime feature-table filter-features \
  --i-table table-without-Chloroplast.qza \
  --m-metadata-file taxonomy.qza \
  --p-where "Taxon NOT LIKE '%Mitochondria%'" \
  --o-filtered-table table-without-Chloroplast-Mitochondria.qza

# filter out unassigned taxa
qiime feature-table filter-features \
  --i-table table-without-Chloroplast-Mitochondria.qza \
  --m-metadata-file taxonomy.qza \
  --p-where "Taxon NOT LIKE '%Unassigned%'" \
  --o-filtered-table table-without-Chloroplast-Mitochondria-Unassigned.qza

# filter out Archaea
qiime feature-table filter-features \
  --i-table table-without-Chloroplast-Mitochondria-Unassigned.qza \
  --m-metadata-file taxonomy.qza \
  --p-where "Taxon NOT LIKE '%Archaea%'" \
  --o-filtered-table table-without-Chloroplast-Mitochondria-Unassigned-Archaea.qza

# filter out Eukaryota
qiime feature-table filter-features \
  --i-table table-without-Chloroplast-Mitochondria-Unassigned-Archaea.qza \
  --m-metadata-file taxonomy.qza \
  --p-where "Taxon NOT LIKE '%Eukaryota%'" \
  --o-filtered-table table-without-Chloroplast-Mitochondria-Unassigned-Archaea-Eukaryota.qza

# make barplots
qiime taxa barplot \
  --i-table table-without-Chloroplast-Mitochondria-Unassigned.qza \
  --i-taxonomy taxonomy.qza \
  --o-visualization taxa-bar-plots-without-Chloroplast-Mitochondria-Unassigned.qzv

# barplots with archaea
qiime taxa barplot \
  --i-table table-without-Chloroplast-Mitochondria-Unassigned-Archaea-Eukaryota.qza \
  --i-taxonomy taxonomy.qza \
  --o-visualization taxa-bar-plots-without-Chloroplast-Mitochondria-Unassigned-Archaea-Eukaryota.qzv

# make phylogeny for diversity analysis
qiime phylogeny align-to-tree-mafft-fasttree \
  --i-sequences rep-seqs.qza \
  --o-alignment aligned-rep-seqs.qza \
  --o-masked-alignment masked-aligned-rep-seqs.qza \
  --o-tree unrooted-tree.qza \
  --o-rooted-tree rooted-tree.qza

# summarize
qiime feature-table summarize \
  --i-table table-without-Chloroplast-Mitochondria-Unassigned-Archaea-Eukaryota.qza \
  --o-visualization table.qzv

# alpha rarefaction
# max depth for 16S leaf 9258
# max depth for 16S rhizo 1794428
qiime diversity alpha-rarefaction \
  --i-table table-without-Chloroplast-Mitochondria-Unassigned-Archaea-Eukaryota.qza \
  --i-phylogeny rooted-tree.qza \
  --p-max-depth 9258 \
  --m-metadata-file sample-metadata.txt \
  --o-visualization alpha-rarefaction.qzv

# core metrics diversity analysis (sampling depth variable, get from table.qzv)
# 522 for leaf
qiime diversity core-metrics-phylogenetic \
  --i-phylogeny rooted-tree.qza \
  --i-table table-without-Chloroplast-Mitochondria-Unassigned-Archaea-Eukaryota.qza \
  --p-sampling-depth 522 \
  --m-metadata-file sample-metadata.txt \
  --output-dir core-metrics-results-1

# test alpha diversity
qiime diversity alpha-group-significance \
  --i-alpha-diversity core-metrics-results/faith_pd_vector.qza \
  --m-metadata-file sample-metadata.txt \
  --o-visualization core-metrics-results/faith-pd-group-significance.qzv

qiime diversity alpha-group-significance \
  --i-alpha-diversity core-metrics-results/evenness_vector.qza \
  --m-metadata-file sample-metadata.txt \
  --o-visualization core-metrics-results/evenness-group-significance.qzv

qiime diversity alpha-group-significance \
  --i-alpha-diversity core-metrics-results/shannon_vector.qza \
  --m-metadata-file sample-metadata.txt \
  --o-visualization core-metrics-results/shannon-group-significance.qzv

# test beta diversity
qiime diversity beta-group-significance \
  --i-distance-matrix core-metrics-results/unweighted_unifrac_distance_matrix.qza \
  --m-metadata-file sample-metadata.txt \
  --m-metadata-column condition \
  --o-visualization core-metrics-results/unweighted-unifrac-condition-significance.qzv \
  --p-pairwise

qiime diversity beta-group-significance \
  --i-distance-matrix core-metrics-results/weighted_unifrac_distance_matrix.qza \
  --m-metadata-file sample-metadata.txt \
  --m-metadata-column condition \
  --o-visualization core-metrics-results/weighted-unifrac-condition-significance.qzv \
  --p-pairwise

qiime diversity beta-group-significance \
  --i-distance-matrix core-metrics-results/bray_curtis_distance_matrix.qza \
  --m-metadata-file sample-metadata.txt \
  --m-metadata-column condition \
  --o-visualization core-metrics-results/bray-curtis-condition-significance.qzv \
  --p-pairwise

qiime diversity beta-group-significance \
  --i-distance-matrix core-metrics-results/jaccard_distance_matrix.qza \
  --m-metadata-file sample-metadata.txt \
  --m-metadata-column condition \
  --o-visualization core-metrics-results/jaccard-condition-significance.qzv \
  --p-pairwise

******************
------------------
NOW MOVING INTO R
------------------
******************
# Check the article for version numbers of packages

# Session info
R version 4.1.1 (2021-08-10)
Platform: x86_64-w64-mingw32/x64 (64-bit)
Running under: Windows 10 x64 (build 19042)

Matrix products: default

Random number generation:
 RNG:     Mersenne-Twister 
 Normal:  Inversion 
 Sample:  Rounding 

----Diversity analysis----

# Install packages
install.packages("vegan")

# Phyloseq needs BiocManager, can't install normally with install.packages
install.packages('BiocManager')
library(BiocManager)

BiocManager::install('phyloseq')

# Load packages
library(phyloseq)
library(vegan)

# Set working directory
setwd("C:/Users/Collin/Documents/PhD Thesis/Chapter 4 - Microbiome Project/")

# LEAF shotgun
# Import biom file
biomfilename = "leaf.biom"
data <- import_biom("C:/Users/Collin/Documents/PhD Thesis/Chapter 4 - Microbiome Project/leaf.biom", parseFunction=parse_taxonomy_default)

# Alpha diversity
data.alpha<-estimate_richness(data)
write.csv(data.alpha, file="leaf-alpha-diversity.csv")

# Beta diversity (Bray-Curtis)
braycurtis <- phyloseq::distance(data, method = "bray")
BCmat <- as.matrix(braycurtis)
write.csv(BCmat, file = "leaf-braycurtis.csv")

# RHIZO shotgun
# Import biom file
biomfilename = "rhizo.biom"
data <- import_biom("C:/Users/Collin/Documents/PhD Thesis/Chapter 4 - Microbiome Project/rhizo.biom", parseFunction=parse_taxonomy_default)

# Alpha diversity
data.alpha<-estimate_richness(data)
write.csv(data.alpha, file="rhizo-alpha-diversity.csv")

# Beta diversity (Bray-Curtis)
braycurtis <- phyloseq::distance(data, method = "bray")
BCmat <- as.matrix(braycurtis)
write.csv(BCmat, file = "rhizo-braycurtis.csv")

# 16S and ITS alpha and beta diversity metrics can be taken from QIIME2 outputs using the .zip file trick
# Download the necessary .qza files and then on your computer manually rename the file extension to .zip and press OK then you can go into the .zip file and get all the data manually and use

# Run the stats
# Set working directory
setwd("C:/Users/Collin/Documents/PhD Thesis/Chapter 4 - Microbiome Project/Beta-Diversity Stuff")

# shotgun leaf
braycurtis <- read.csv("leaf-braycurtis.csv")
metadata <- read.csv("leafmeta.csv")
anova(betadisper(dist(braycurtis), as.factor(metadata$Condition))) # not sig
permutest(betadisper(dist(braycurtis), as.factor(metadata$Condition)), pairwise = TRUE) # not sig
adonis(formula = dist(braycurtis) ~ Condition, data = metadata) # not sig

# shotgun rhizo
braycurtis <- read.csv("rhizo-braycurtis.csv")
metadata <- read.csv("rhizometa.csv")
anova(betadisper(dist(braycurtis), as.factor(metadata$Condition))) # < 0.1
permutest(betadisper(dist(braycurtis), as.factor(metadata$Condition)), pairwise = TRUE) # < 0.01
adonis(formula = dist(braycurtis) ~ Condition, data = metadata) # not sig

# 16S leaf
braycurtis <- read.csv("leaf-16S-braycurtis.csv")
metadata <- read.csv("leaf16smeta.csv")
anova(betadisper(dist(braycurtis), as.factor(metadata$Condition))) # < 0.05
permutest(betadisper(dist(braycurtis), as.factor(metadata$Condition)), pairwise = TRUE) # < 0.01
adonis(formula = dist(braycurtis) ~ Condition, data = metadata) # not sig

# 16S rhizo
braycurtis <- read.csv("rhizo-16S-braycurtis.csv")
metadata <- read.csv("rhizo16smeta.csv")
anova(betadisper(dist(braycurtis), as.factor(metadata$Condition))) # not sig
permutest(betadisper(dist(braycurtis), as.factor(metadata$Condition)), pairwise = TRUE) # not sig
adonis(formula = dist(braycurtis) ~ Condition, data = metadata) # not sig

# ITS leaf
braycurtis <- read.csv("leaf-ITS-braycurtis.csv")
metadata <- read.csv("leafITSmeta.csv")
anova(betadisper(dist(braycurtis), as.factor(metadata$Condition))) # not sig
permutest(betadisper(dist(braycurtis), as.factor(metadata$Condition)), pairwise = TRUE) # not sig
adonis(formula = dist(braycurtis) ~ Condition, data = metadata) # not sig

# ITS rhizo
braycurtis <- read.csv("rhizo-ITS-braycurtis.csv")
metadata <- read.csv("rhizoITSmeta.csv")
anova(betadisper(dist(braycurtis), as.factor(metadata$Condition))) # not sig
permutest(betadisper(dist(braycurtis), as.factor(metadata$Condition)), pairwise = TRUE) # not sig
adonis(formula = dist(braycurtis) ~ Condition, data = metadata) # not sig

# 16S leaf kit
braycurtis <- read.csv("leaf-16S-kit-braycurtis.csv")
metadata <- read.csv("leaf16skitmeta.csv")
anova(betadisper(dist(braycurtis), as.factor(metadata$Type))) # p = 3.262e-5 ( < 0.00001 )
permutest(betadisper(dist(braycurtis), as.factor(metadata$Type)), pairwise = TRUE) # p = 0.001
adonis(formula = dist(braycurtis) ~ Type, data = metadata) #  = 0.02

# 16S rhizo kit
braycurtis <- read.csv("rhizo-16S-kit-braycurtis.csv")
metadata <- read.csv("rhizo16skitmeta.csv")
anova(betadisper(dist(braycurtis), as.factor(metadata$Type))) # p < 0.01
permutest(betadisper(dist(braycurtis), as.factor(metadata$Type)), pairwise = TRUE) # p = 0.001
adonis(formula = dist(braycurtis) ~ Type, data = metadata) # p = 0.007 ( < 0.01 )

# ITS leaf kit
braycurtis <- read.csv("leaf-ITS-kit-braycurtis.csv")
metadata <- read.csv("leafITskitmeta.csv")
anova(betadisper(dist(braycurtis), as.factor(metadata$Type))) # p < 0.1
permutest(betadisper(dist(braycurtis), as.factor(metadata$Type)), pairwise = TRUE) # p < 0.05
adonis(formula = dist(braycurtis) ~ Type, data = metadata) # not sig

# ITS rhizo kit
braycurtis <- read.csv("rhizo-ITS-kit-braycurtis.csv")
metadata <- read.csv("rhizoITskitmeta.csv")
anova(betadisper(dist(braycurtis), as.factor(metadata$Type))) # p < 0.01
permutest(betadisper(dist(braycurtis), as.factor(metadata$Type)), pairwise = TRUE) # p < 0.05
adonis(formula = dist(braycurtis) ~ Type, data = metadata) # p <0.05


----PCoA ordination plots----

# Install packages
library(ggplot2)
library(ggforce)

# Set working directory
setwd("C:/Users/Collin/Documents/PhD Thesis/Chapter 4 - Microbiome Project/")

# Load data
data=read.csv("C:/Users/Collin/Documents/PhD Thesis/Chapter 4 - Microbiome Project/pcoa.csv")
data$sample <- as.factor(data$sample)

# Make plots
ggplot(data, aes(x=axis1, y=axis2)) + geom_point(aes(col=sample)) + 
  geom_mark_ellipse(data=data, aes(x=axis1, y=axis2, col=sample, 
    fill=after_scale(alpha(col, 0.2))),expand=0.05, size=0.2, show.legend=FALSE) + 
  xlab('PCoA1') + ylab('PCoA2') + 
  facet_grid(. ~ type) + coord_fixed(ratio = 1.2) + theme_bw()

# Redo for sample vs. kits
data=read.csv("C:/Users/Collin/Documents/PhD Thesis/Chapter 4 - Microbiome Project/pcoa-kits.csv")
data$sample <- as.factor(data$sample)
ggplot(data, aes(x=axis1, y=axis2)) + geom_point(aes(col=sample)) + scale_color_manual(values = c("#2495FF","#FFD500")) + 
  geom_mark_ellipse(data=data, aes(x=axis1, y=axis2, col=sample, fill=after_scale(alpha(col, 0.2))),expand=0.05, size=0.2, show.legend=FALSE) + 
  xlab('PCoA1') + ylab('PCoA2') + 
  facet_grid(. ~ type) + coord_fixed(ratio = 1.2) + theme_bw()

# As always, clean up plots in inkscape if need be

----ANCOM-BC----

# Install packages
library(glmmTMB)
library(RCurl)
library(stringi)
library(phyloseq)
library(dplyr)
library(nloptr)
library(ANCOMBC)

# Set working directory
setwd('C:/Users/Collin/Documents/PhD Thesis/Chapter 4 - Microbiome Project/ANCOM')

# Leaf shotgun
# Prepare data
species = read.csv('leaf-species.csv')
metadata = read.csv('leaf-metadata.csv')

otu = species
rownames(otu) <- otu[,1]
otu[,1] <- NULL

rownames(metadata) <- metadata[,1]
metadata[,1] <- NULL

phyloseq.otu = otu_table(otu, taxa_are_rows = TRUE)
phyloseq.meta = sample_data(metadata)
phyloseq.object = phyloseq(phyloseq.otu, phyloseq.meta)

feature.table = phyloseq.object

# run ANCOM-BC
out = ancombc(feature.table, formula = "condition", p_adj_method = "BH", conserve = TRUE)
res = out$res

write.csv(res, "ancom-leaf-species10.csv")


# Rhizo shotgun
# Prepare data
species = read.csv('rhizo-species.csv')
metadata = read.csv('rhizo-metadata.csv')

otu = species
rownames(otu) <- otu[,1]
otu[,1] <- NULL

rownames(metadata) <- metadata[,1]
metadata[,1] <- NULL

phyloseq.otu = otu_table(otu, taxa_are_rows = TRUE)
phyloseq.meta = sample_data(metadata)
phyloseq.object = phyloseq(phyloseq.otu, phyloseq.meta)

feature.table = phyloseq.object

# run ANCOM-BC
out = ancombc(feature.table, formula = "condition", p_adj_method = "BH", conserve = TRUE)
res = out$res

write.csv(res, "ancom-rhizo-species.csv")

# Rhizo ITS
# Prepare data
species = read.csv('rhizo-its.csv')
metadata = read.csv('rhizo-metadata.csv')

otu = species
rownames(otu) <- otu[,1]
otu[,1] <- NULL

rownames(metadata) <- metadata[,1]
metadata[,1] <- NULL

phyloseq.otu = otu_table(otu, taxa_are_rows = TRUE)
phyloseq.meta = sample_data(metadata)
phyloseq.object = phyloseq(phyloseq.otu, phyloseq.meta)

feature.table = phyloseq.object

# run ANCOM-BC
out = ancombc(feature.table, formula = "condition", p_adj_method = "BH", conserve = TRUE)
res = out$res
write.csv(res, "ancom-rhizo-ITS.csv")

# Leaf ITS
# Prepare data
species = read.csv('leaf-its.csv')
metadata = read.csv('leaf-metadata.csv')

otu = species
rownames(otu) <- otu[,1]
otu[,1] <- NULL

rownames(metadata) <- metadata[,1]
metadata[,1] <- NULL

phyloseq.otu = otu_table(otu, taxa_are_rows = TRUE)
phyloseq.meta = sample_data(metadata)
phyloseq.object = phyloseq(phyloseq.otu, phyloseq.meta)

feature.table = phyloseq.object

# run ANCOM-BC
out = ancombc(feature.table, formula = "condition", p_adj_method = "BH", conserve = TRUE)
res = out$res
write.csv(res, "ancom-leaf-ITS.csv")

# Leaf 16S
# Prepare data
species = read.csv('leaf-16s.csv')
metadata = read.csv('leaf-metadata.csv')

otu = species
rownames(otu) <- otu[,1]
otu[,1] <- NULL

rownames(metadata) <- metadata[,1]
metadata[,1] <- NULL

phyloseq.otu = otu_table(otu, taxa_are_rows = TRUE)
phyloseq.meta = sample_data(metadata)
phyloseq.object = phyloseq(phyloseq.otu, phyloseq.meta)

feature.table = phyloseq.object

# run ANCOM-BC
out = ancombc(feature.table, formula = "condition", p_adj_method = "BH", conserve = TRUE)
res = out$res
write.csv(res, "ancom-leaf-16S.csv")

# Rhizo 16S
# Prepare data
species = read.csv('rhizo-16s.csv')
metadata = read.csv('rhizo-metadata.csv')

otu = species
rownames(otu) <- otu[,1]
otu[,1] <- NULL

rownames(metadata) <- metadata[,1]
metadata[,1] <- NULL

phyloseq.otu = otu_table(otu, taxa_are_rows = TRUE)
phyloseq.meta = sample_data(metadata)
phyloseq.object = phyloseq(phyloseq.otu, phyloseq.meta)

feature.table = phyloseq.object

# run ANCOM-BC
out = ancombc(feature.table, formula = "condition", p_adj_method = "BH", conserve = TRUE)
res = out$res
write.csv(res, "ancom-rhizo-16S.csv")

----MAASLIN2----

# Install package
library(devtools)
devtools::install_github("biobakery/maaslin2", force = TRUE)
library(Maaslin2)

# Set working directory
setwd('C:/Users/Collin/Documents/PhD Thesis/Chapter 4 - Microbiome Project/Maaslin2')

# Leaf Gene Families
# Load data
data = read.delim('leaf-genes-pfam.txt', header = TRUE, sep = '\t')
metadata = read.delim('leaf-metadata.txt', header = TRUE, sep = '\t')

# Run maaslin2
out = Maaslin2(
  data, metadata, output = 'leaf-genes-pfam',
  transform = "LOG",
  fixed_effects = "condition",
  analysis_method = "LM",
  correction = "BH",
  normalization = 'TSS',
  standardize = FALSE,
  plot_heatmap = TRUE,
  plot_scatter = TRUE,
  min_prevalence = 0.1,
  max_significance = 0.25)

# Leaf Pathways
# Load data
data = read.delim('leaf-pathways.txt', header = TRUE, sep = '\t')
metadata = read.delim('leaf-metadata.txt', header = TRUE, sep = '\t')

# Run maaslin2
out = Maaslin2(
  data, metadata, output = 'leaf-pathways',
  transform = "LOG",
  fixed_effects = "condition",
  analysis_method = "LM",
  correction = "BH",
  normalization = 'TSS',
  standardize = FALSE,
  plot_heatmap = TRUE,
  plot_scatter = TRUE,
  min_prevalence = 0.1,
  max_significance = 0.25)

# Rhizo Gene Families
# Load data
data = read.delim('rhizo-genes-pfam.txt', header = TRUE, sep = '\t')
metadata = read.delim('rhizo-metadata.txt', header = TRUE, sep = '\t')

# Run maaslin2
out = Maaslin2(
  data, metadata, output = 'rhizo-genes-pfam',
  transform = "LOG",
  fixed_effects = "condition",
  analysis_method = "LM",
  correction = "BH",
  normalization = 'TSS',
  standardize = FALSE,
  plot_heatmap = TRUE,
  plot_scatter = TRUE,
  max_significance = 0.25,
  min_prevalence = 0.1)

# Rhizo Pathways
# Load data
data = read.delim('rhizo-pathways.txt', header = TRUE, sep = '\t')
metadata = read.delim('rhizo-metadata.txt', header = TRUE, sep = '\t')

# Run maaslin2
out = Maaslin2(
  data, metadata, output = 'rhizo-pathways',
  transform = "LOG",
  fixed_effects = "condition",
  analysis_method = "LM",
  correction = "BH",
  normalization = 'TSS',
  standardize = FALSE,
  plot_heatmap = TRUE,
  plot_scatter = TRUE,
  max_significance = 0.25,
  min_prevalence = 0.1)

----PRUNE TOP FEATURES FOR HEATMAPS----

# load packages
library(phyloseq)
library(ggplot2)
library(reshape2)
library(plyr)

# Set working directory
setwd("C:/Users/Collin/Documents/PhD Thesis/Chapter 4 - Microbiome Project/Maaslin2/")

# LEAF GENES
# load data
species = read.csv('leaf-genes-pfam2.csv')

# prepare data for phyloseq
otu = species
rownames(otu) <- otu[,1]
otu[,1] <- NULL

# prepare phyloseq object for pruning
phyloseq.otu = otu_table(otu, taxa_are_rows = TRUE)
phyloseq.object = phyloseq(phyloseq.otu)
feature.table = phyloseq.object

# sort most abundant taxa [1:TopN]
most_abundant_taxa <- sort(taxa_sums(feature.table), TRUE)[1:50]

# prune taxa
pt <- prune_taxa(names(most_abundant_taxa), feature.table)

# convert data to long format for ggplot
data = melt(pt)

# plot heatmap (midpoint: 0.1 for top 20, 0.01 for top 50)
ggplot(data, aes(Var2, Var1)) +
  geom_tile(aes(fill=value), colour="white") +
  scale_fill_gradient(name = "Average Relative\nAbundance", 
                       low="white", high = "#2495FF") +
  coord_fixed(ratio = 0.7) +
  labs(x = "", y = "") +
  theme_grey() +
  theme(axis.text.x = element_text(angle = 90, vjust = 0.5))

# RHIZO GENES
# load data
species = read.csv('rhizo-genes-pfam2.csv')

# prepare data for phyloseq
otu = species
rownames(otu) <- otu[,1]
otu[,1] <- NULL

# prepare phyloseq object for pruning
phyloseq.otu = otu_table(otu, taxa_are_rows = TRUE)
phyloseq.object = phyloseq(phyloseq.otu)
feature.table = phyloseq.object

# sort most abundant taxa [1:TopN]
most_abundant_taxa <- sort(taxa_sums(feature.table), TRUE)[1:50]

# prune taxa
pt <- prune_taxa(names(most_abundant_taxa), feature.table)

# convert data to long format for ggplot
data = melt(pt)

# plot heatmap
ggplot(data, aes(Var2, Var1)) +
  geom_tile(aes(fill=value), colour="white") +
  scale_fill_gradient2(name = "Average Relative\nAbundance", 
                       low = "white", mid = "white", high = "#2495FF") +
  coord_fixed(ratio = 0.7) +
  labs(x = "", y = "") +
  theme_grey() +
  theme(axis.text.x = element_text(angle = 90, vjust = 0.5))

# RHIZO PATHWAYS
# load data
species = read.csv('rhizo pathways relab2.csv')

# prepare data for phyloseq
otu = species
rownames(otu) <- otu[,1]
otu[,1] <- NULL

# prepare phyloseq object for pruning
phyloseq.otu = otu_table(otu, taxa_are_rows = TRUE)
phyloseq.object = phyloseq(phyloseq.otu)
feature.table = phyloseq.object

# sort most abundant taxa [1:TopN]
most_abundant_taxa <- sort(taxa_sums(feature.table), TRUE)[1:50]

# prune taxa
pt <- prune_taxa(names(most_abundant_taxa), feature.table)

# convert data to long format for ggplot
data = melt(pt)

# plot heatmap (midpoint: 0.1 for top 20, 0.01 for top 50)
ggplot(data, aes(Var2, Var1)) +
  geom_tile(aes(fill=value), colour="white") +
  scale_fill_gradient(name = "Average Relative\nAbundance", 
                      low="white", high = "#2495FF") +
  coord_fixed(ratio = 0.7) +
  labs(x = "", y = "") +
  theme_grey() +
  theme(axis.text.x = element_text(angle = 90, vjust = 0.5))


# LEAF PATHWAYS
# load data
species = read.csv('leaf pathways relab2.csv')

# prepare data for phyloseq
otu = species
rownames(otu) <- otu[,1]
otu[,1] <- NULL

# prepare phyloseq object for pruning
phyloseq.otu = otu_table(otu, taxa_are_rows = TRUE)
phyloseq.object = phyloseq(phyloseq.otu)
feature.table = phyloseq.object

# sort most abundant taxa [1:TopN]
most_abundant_taxa <- sort(taxa_sums(feature.table), TRUE)[1:50]

# prune taxa
pt <- prune_taxa(names(most_abundant_taxa), feature.table)

# convert data to long format for ggplot
data = melt(pt)

# plot heatmap (midpoint: 0.1 for top 20, 0.01 for top 50)
ggplot(data, aes(Var2, Var1)) +
  geom_tile(aes(fill=value), colour="white") +
  scale_fill_gradient(name = "Average Relative\nAbundance", 
                      low="white", high = "#2495FF") +
  coord_fixed(ratio = 0.7) +
  labs(x = "", y = "") +
  theme_grey() +
  theme(axis.text.x = element_text(angle = 90, vjust = 0.5))

----CORRELATION BETWEEN SHOTGUN AND AMPLICON----

# Load packages
library(ggplot2)
library(ggforce)

# Set working directory
setwd("C:/Users/Collin/Documents/PhD Thesis/Chapter 4 - Microbiome Project/Correlation")


# CA RHIZO-----------------------------------------------------------------------------------------------
# Load data for scatterplots
d <- read.table(
  'rhizo-ca-shotgun-16s-2.txt',
  sep='\t',
  header=TRUE
)
e <- read.table(
  'rhizo-ca-shotgun-its.txt',
  sep='\t',
  header=TRUE
)


plot <- ggplot( d, aes( x=Amplicon, y=Shotgun ) ) +
  geom_point( colour="#2495FF", size=4 ) +
  geom_point( data=e, colour="#FFD500", size=4) +
  stat_smooth(method="lm", se=F, colour="#2495FF", size=2, fullrange=T, ) +
  stat_smooth(data=e, method="lm", se=F, colour="#FFD500", size=2, fullrange=T) +
  scale_y_log10() +
  scale_x_log10() + 
  theme_bw(base_size = 30) + coord_fixed(ratio = 1, ylim = c(1e-6,1e0), xlim = c(1e-6,1e0)) + 
  theme(axis.text.y = element_text(colour = "black"),
        axis.text.x = element_text(colour = "black"), 
        panel.grid.major = element_blank(), 
        panel.grid.minor = element_blank())
plot

# Determine linear regression parameters
shotgun16s <- lm( d$Shotgun ~ d$Amplicon, data=d )
shotgunits <- lm( e$Shotgun ~ e$Amplicon, data=e )


# Print to screen summary of linear regression models
summary(shotgun16s)
summary(shotgunits)

# NA Rhizo-----------------------------------------------------------------------------------------

# Load data for scatterplots
d <- read.table(
  'rhizo-na-shotgun-16s.txt',
  sep='\t',
  header=TRUE
)
e <- read.table(
  'rhizo-na-shotgun-its.txt',
  sep='\t',
  header=TRUE
)

plot <- ggplot( d, aes( x=Amplicon, y=Shotgun ) ) +
  geom_point( colour="#2495FF", size=4 ) +
  geom_point( data=e, colour="#FFD500", size=4) +
  stat_smooth(method="lm", se=F, colour="#2495FF", size=2, fullrange=T, ) +
  stat_smooth(data=e, method="lm", se=F, colour="#FFD500", size=2, fullrange=T) +
  scale_y_log10() +
  scale_x_log10() + 
  theme_bw(base_size = 30) + coord_fixed(ratio = 1, ylim = c(1e-6,1e0), xlim = c(1e-6,1e0)) + 
  theme(axis.text.y = element_text(colour = "black"),
        axis.text.x = element_text(colour = "black"), 
        panel.grid.major = element_blank(), 
        panel.grid.minor = element_blank())
plot

# Determine linear regression parameters
shotgun16s <- lm( d$Shotgun ~ d$Amplicon, data=d )
shotgunits <- lm( e$Shotgun ~ e$Amplicon, data=e )


# Print to screen summary of linear regression models
summary(shotgun16s)
summary(shotgunits)

# CA Leaf---------------------------------------------------------------

# Load data for scatterplots
d <- read.table(
  'leaf-ca-shotgun-16s.txt',
  sep='\t',
  header=TRUE
)


plot <- ggplot( d, aes( x=Amplicon, y=Shotgun ) ) +
  geom_point( colour="#2495FF", size=4 ) +
  stat_smooth(method="lm", se=F, colour="#2495FF", size=2, fullrange=T, ) +
  scale_y_log10() +
  scale_x_log10() + 
  theme_bw(base_size = 30) + coord_fixed(ratio = 1, ylim = c(1e-4,1e0), xlim = c(1e-4,1e0)) + 
  theme(axis.text.y = element_text(colour = "black"),
        axis.text.x = element_text(colour = "black"), 
        panel.grid.major = element_blank(), 
        panel.grid.minor = element_blank())
plot

# Determine linear regression parameters
shotgun16s <- lm( d$Shotgun ~ d$Amplicon, data=d )
shotgunits <- lm( e$Shotgun ~ e$Amplicon, data=e )


# Print to screen summary of linear regression models
summary(shotgun16s)
summary(shotgunits)

# NA Leaf---------------------------------------------------------------

# Load data for scatterplots
d <- read.table(
  'leaf-na-shotgun-16s.txt',
  sep='\t',
  header=TRUE
)
e <- read.table(
  'leaf-na-shotgun-its.txt',
  sep='\t',
  header=TRUE
)

plot <- ggplot( d, aes( x=Amplicon, y=Shotgun ) ) +
  geom_point( colour="#2495FF", size=4 ) +
  geom_point( data=e, colour="#FFD500", size=4) +
  stat_smooth(method="lm", se=F, colour="#2495FF", size=2, fullrange=T, ) +
  stat_smooth(data=e, method="lm", se=F, colour="#FFD500", size=2, fullrange=T) +
  scale_y_log10() +
  scale_x_log10() + 
  theme_bw(base_size = 30) + coord_fixed(ratio = 1, ylim = c(1e-4,1e0), xlim = c(1e-4,1e0)) + 
  theme(axis.text.y = element_text(colour = "black"),
        axis.text.x = element_text(colour = "black"), 
        panel.grid.major = element_blank(), 
        panel.grid.minor = element_blank())
plot

# Determine linear regression parameters
shotgun16s <- lm( d$Shotgun ~ d$Amplicon, data=d )
shotgunits <- lm( e$Shotgun ~ e$Amplicon, data=e )


# Print to screen summary of linear regression models
summary(shotgun16s)
summary(shotgunits)
